# Supplementary material for: Monitoring the prolonged Tnf stimulation in space and time with topological-functional networks
Source: PubMed Central journal article supplement — Comput Struct Biotechnol J. 2020 Jan 18;18:220–9. doi: 10.1016/j.csbj.2020.01.001 (PMC6994266; doi:10.1016/j.csbj.2020.01.001), 2020-01-18

**EarlyIntermediateUp**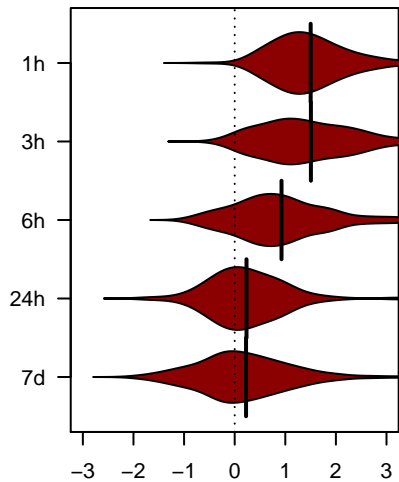**IntermediateUp**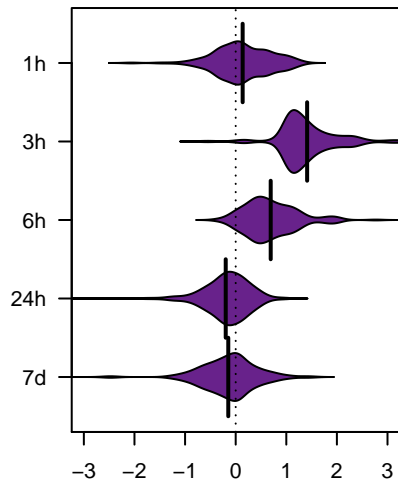**LateUp**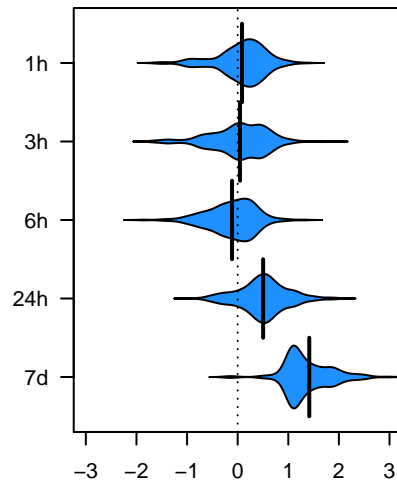**EarlyUpLateDown**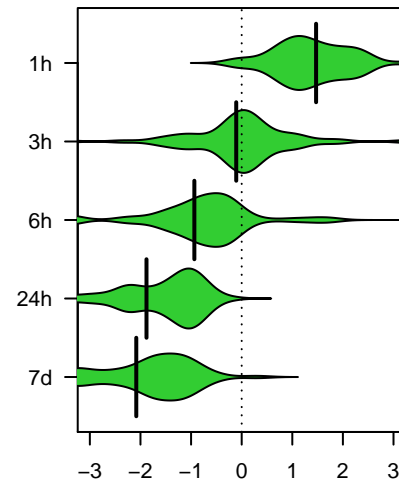**EarlyDown**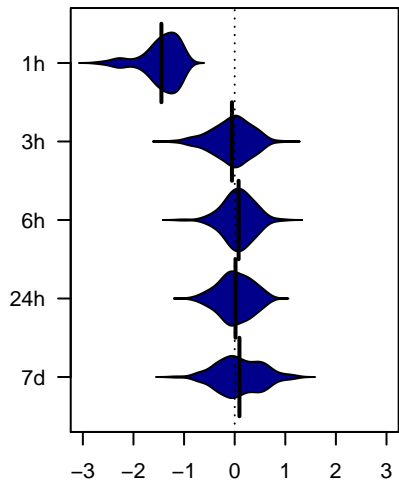**IntermediateDown**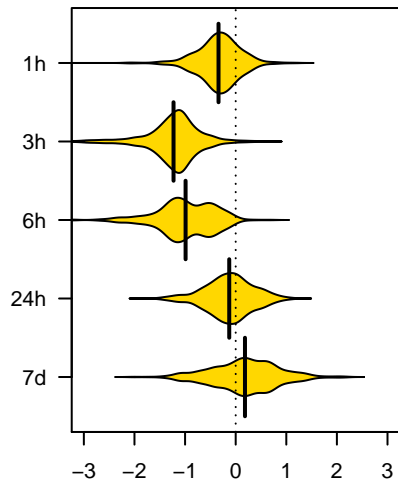**LateDown**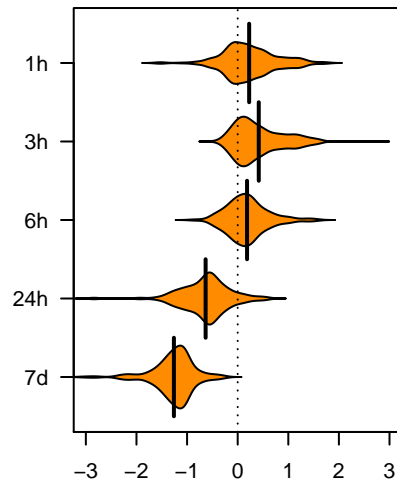**LateDown**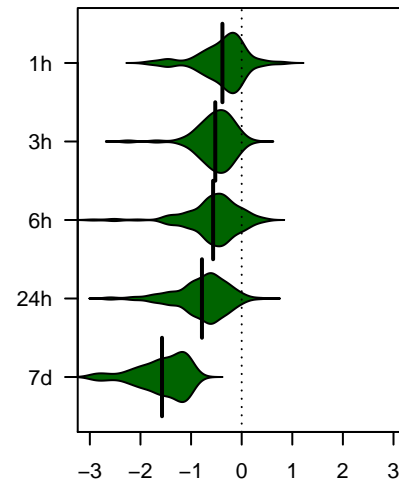

Supplement: mmc4.pdf [file mmc4.pdf]
