# Supplementary material for: Monitoring the prolonged Tnf stimulation in space and time with topological-functional networks
Source: PubMed Central journal article supplement — Comput Struct Biotechnol J. 2020 Jan 18;18:220–9. doi: 10.1016/j.csbj.2020.01.001 (PMC6994266; doi:10.1016/j.csbj.2020.01.001), 2020-01-18
Supplement: mmc8.pdf [file mmc8.pdf]

|     | Over-Expressed Genes | Under-Expressed Genes | Total DE Genes |
|-----|----------------------|-----------------------|----------------|
| 1h  | 192                  | 146                   | 338            |
| 3h  | 303                  | 347                   | 650            |
| 6h  | 117                  | 266                   | 383            |
| 24h | 40                   | 152                   | 192            |
| 7d  | 281                  | 394                   | 675            |
