# Supplementary figures and images for: Monitoring the prolonged Tnf stimulation in space and time with topological-functional networks
Source: PubMed Central journal article supplement — Comput Struct Biotechnol J. 2020 Jan 18;18:220–9. doi: 10.1016/j.csbj.2020.01.001 (PMC6994266; doi:10.1016/j.csbj.2020.01.001), 2020-01-18

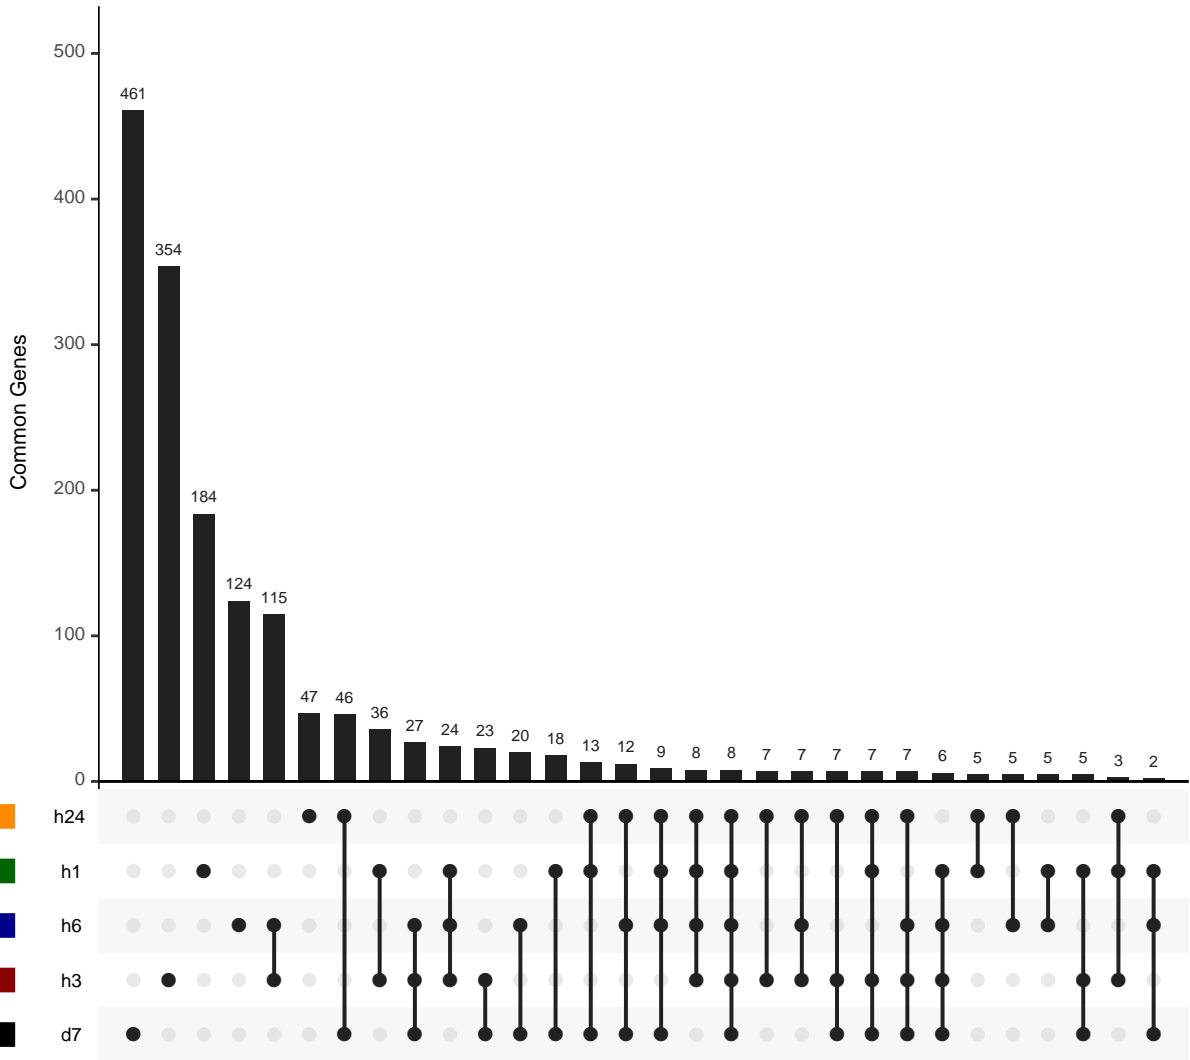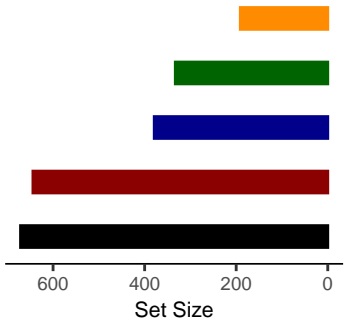

Supplement: mmc2.pdf [file mmc2.pdf]

# Early Activation – Late Repression

## Functional Enrichments

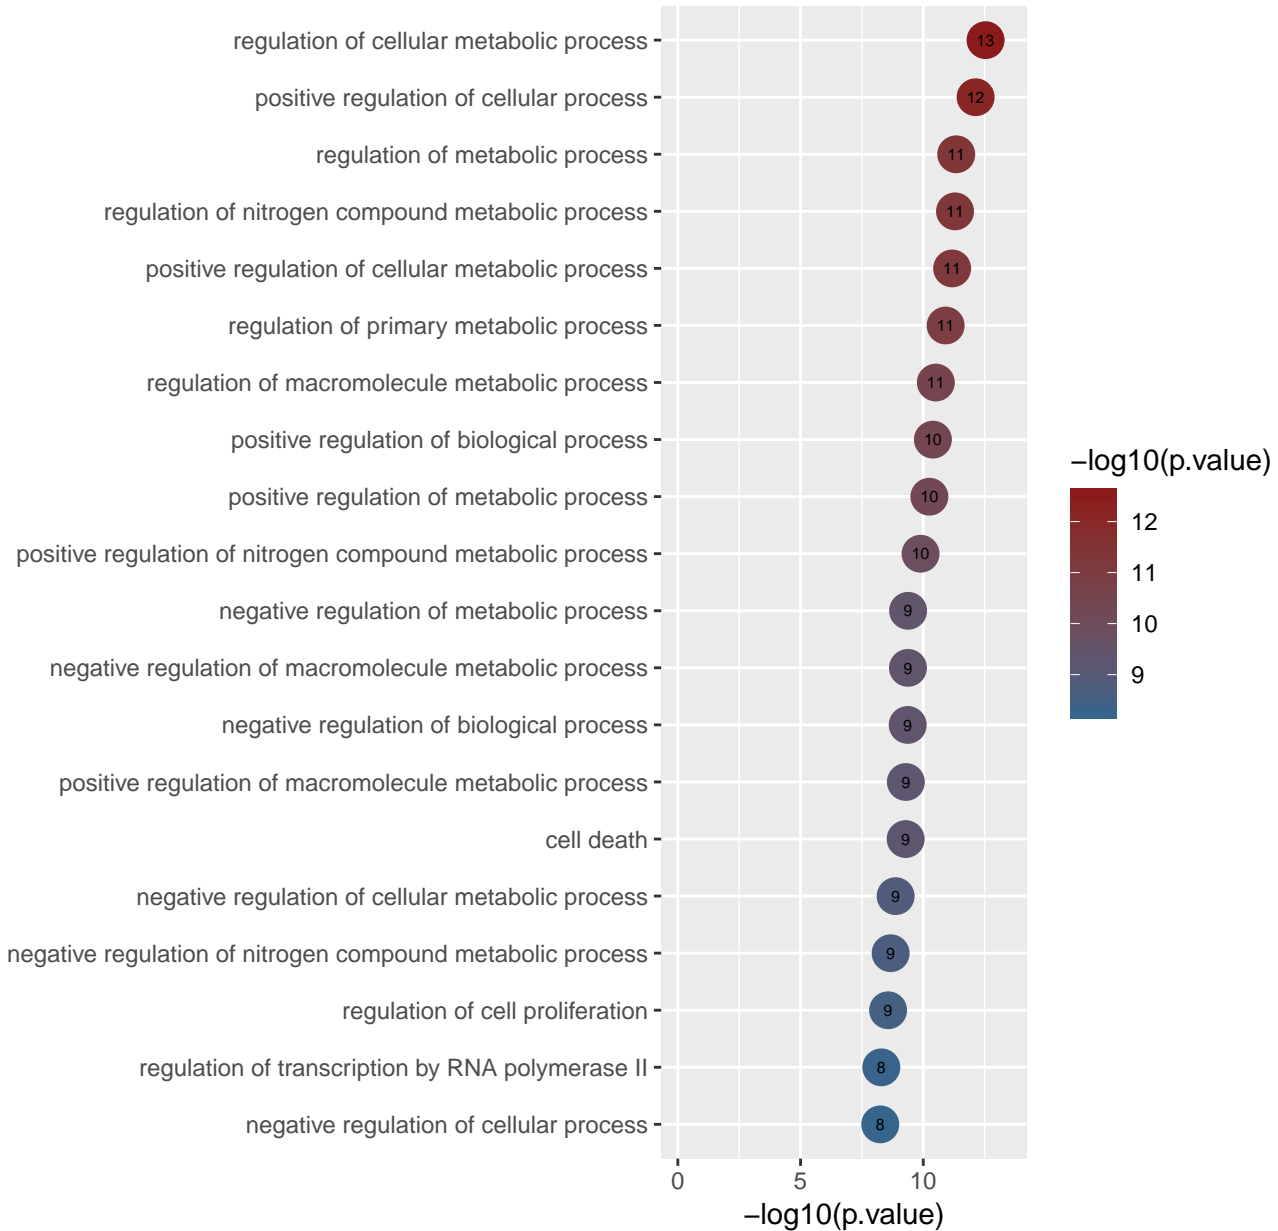

Supplement: mmc3.pdf [file mmc3.pdf]

# DFD Deregulation Score

timepoint h1 h3 h6 h24 d7

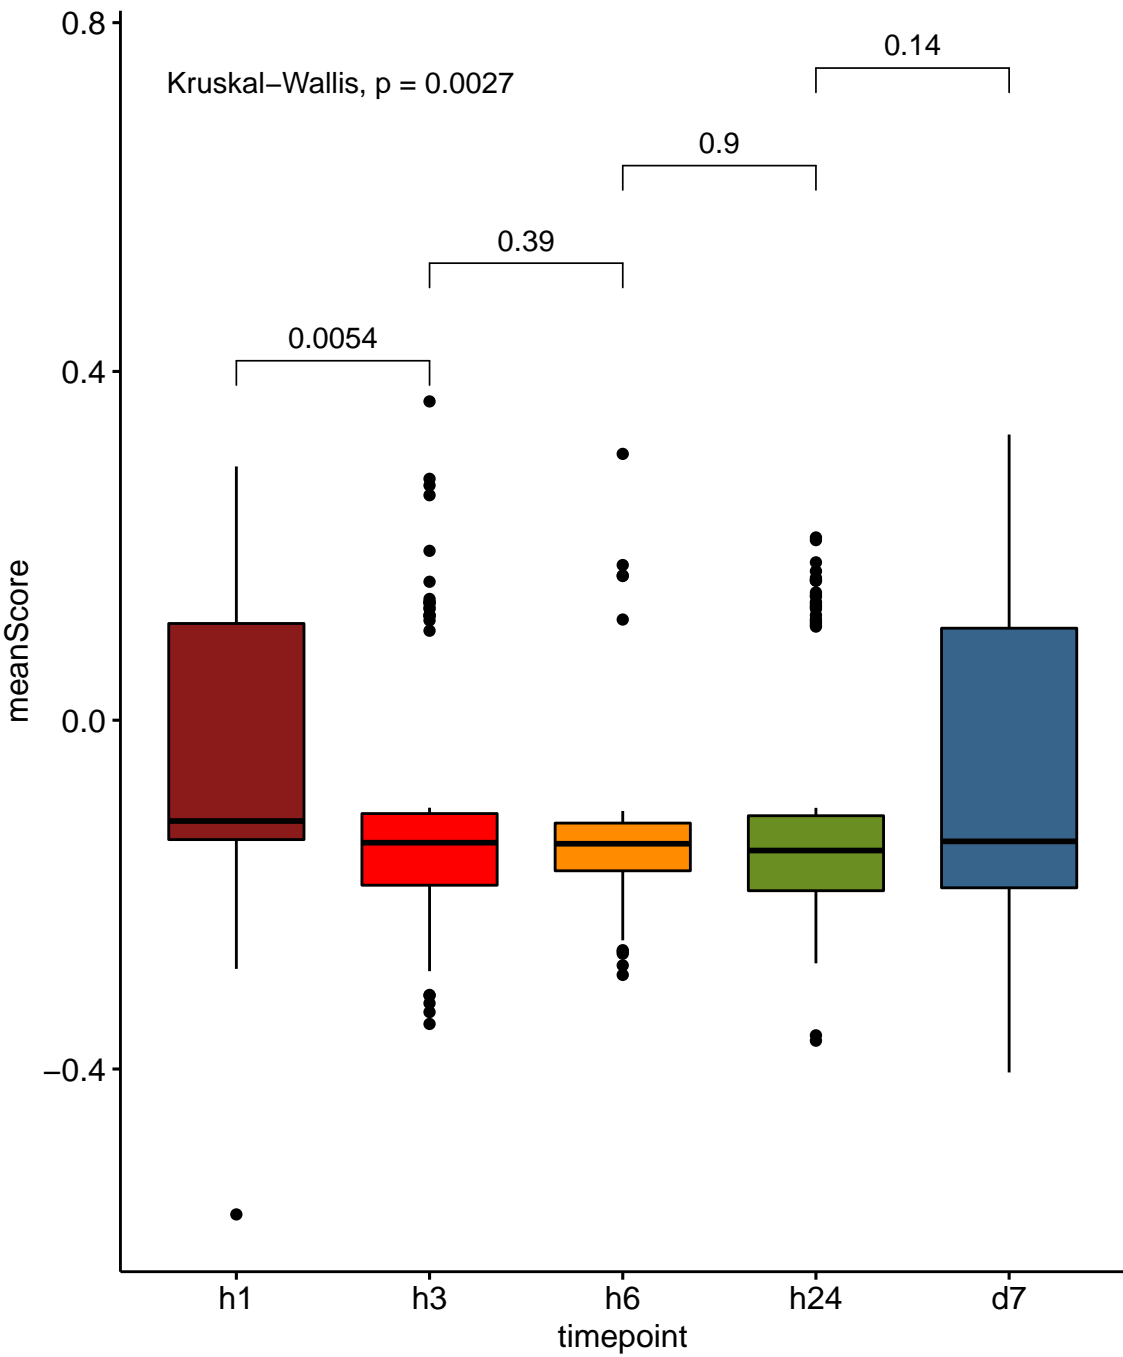

Supplement: mmc5.pdf [file mmc5.pdf]

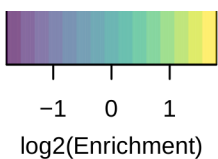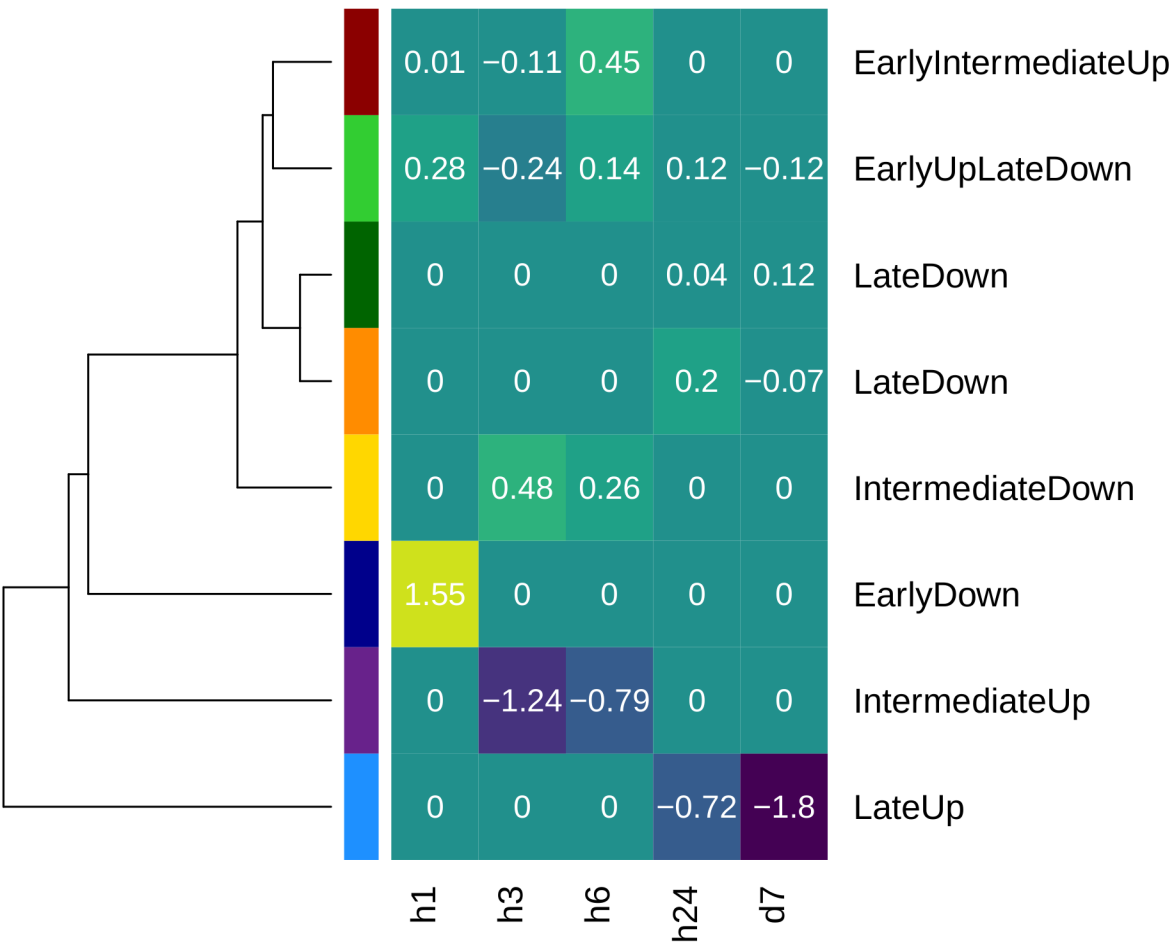

Supplement: mmc6.pdf [file mmc6.pdf]

# Function Dynamics in Bipartite Networks

Transition ■ h1->h3 ■ h3->h6 ■ h6->h24 ■ h24->d7

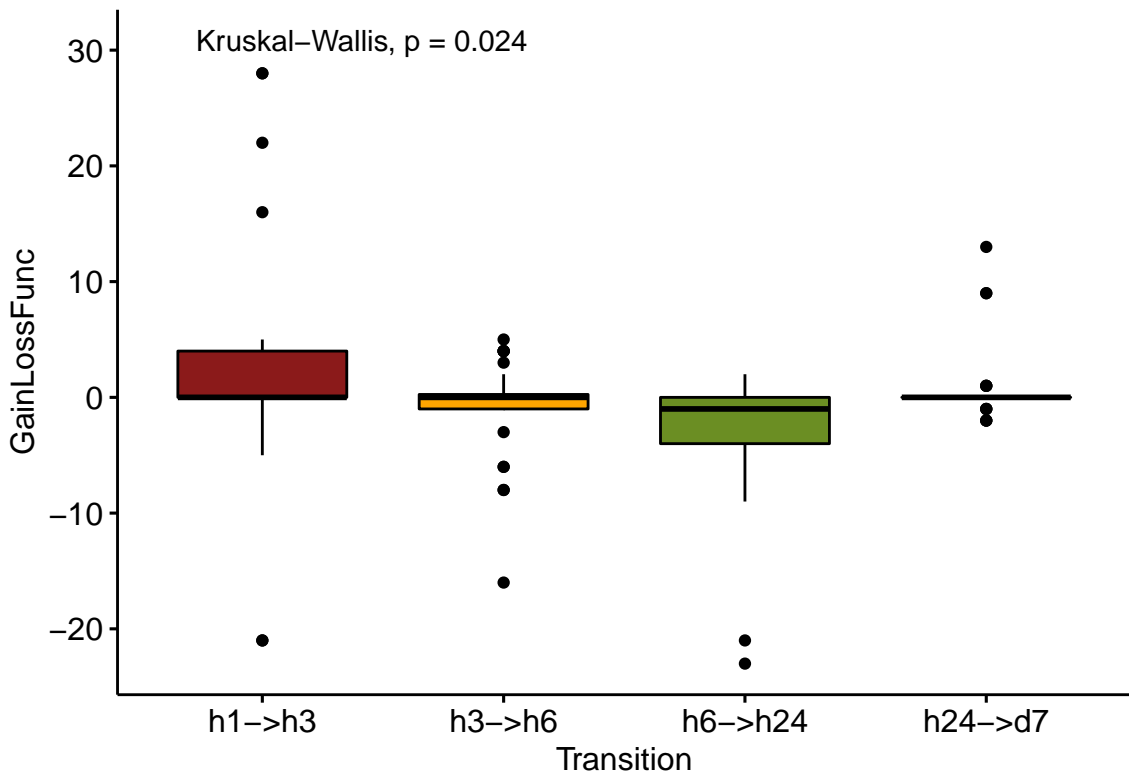

Supplement: mmc7.pdf [file mmc7.pdf]
